# Supplementary material
Source: publisher figshare collection journal article supplement (https://acs.figshare.com/ndownloader/files/4223038)
Supplement: Supplementary file 1 [file 4223038]

# Localized Surface Plasmon Resonances of Anisotropic Semiconductor Nanocrystals

Su-Wen Hsu, Kathy On, and Andrea R. Tao\*

## Supporting Information

### Methods

#### Chemicals:

1-dodecanethiol ( $C_{12}H_{25}SH$ , 98%, Labcaster), copper nitrate ( $Cu(NO_3)_2 \cdot 2.5H_2O$ , Fisher), ethanol ( $CH_3OH$ , Goldshield chemical), chloroform ( $CHCl_3$ , Fisher), carbon tetrachloride ( $CCl_4$ , 99%, Sigma-Aldrich)

#### Synthesis of Cu-alkanethiolate precursor:

A 2.0 M solution of 1-dodecanethiol in ethanol was prepared by mixing 4.83 mL of 1-dodecanethiol (20 mM) with 10 mL ethanol in a glass vial. An aqueous 1.0 M copper nitrate solution was prepared by dissolving 1.16 g copper nitrate (5 mM) in 5 mL DI water in a glass vial. The dodecanethiol solution was added to the copper nitrate solution by vigorous stirring until the solution became colorless and a yellow-white suspension formed. The yellow-white suspension was collected by centrifugation, washed two times with DI-water and ethanol (volume ratio of 1:2) to remove the excess reagents, and then dried in a vacuum desiccator overnight to remove residual solvent and to obtain a yellow-white powder.

#### Synthesis of $Cu_{2-x}S$ nanoparticles and nanodisks:

The precursor was placed in a glass vial and heated in an oil bath at a temperature between 200°C to 220°C. The precursor turned into a dark-brown liquid which was then cooled to room temperature, dispersed in chloroform, and centrifuged at 7500 rpm for 7.5 min. to remove any by-products. This purification process was repeated three times. The purified product was dried under vacuum to obtain a brown powder for characterization.

#### Oxidation of $Cu_{2-x}S$ :

The purified and dried  $Cu_{2-x}S$  powder was placed into an uncovered glass vial and heated in an oven at 80°C.

#### Sample characterization:

To prepare samples for TEM, the  $Cu_{2-x}S$  powder obtained from synthesis was dispersed in chloroform and drop-casted onto a 200 mesh carbon-film coated Cu grid, then dried overnight to remove all traces of chloroform. UV-Vis-NIR spectroscopy (Shimadzu UV-3600) was used to characterize the surface plasmon resonance peaks of the  $Cu_{2-x}S$  products. For LSPR measurements, the powder product was dispersed in carbon tetrachloride and NIR transmission was obtained in the range of 800 nm to 3200 nm.

## XRD Characterization

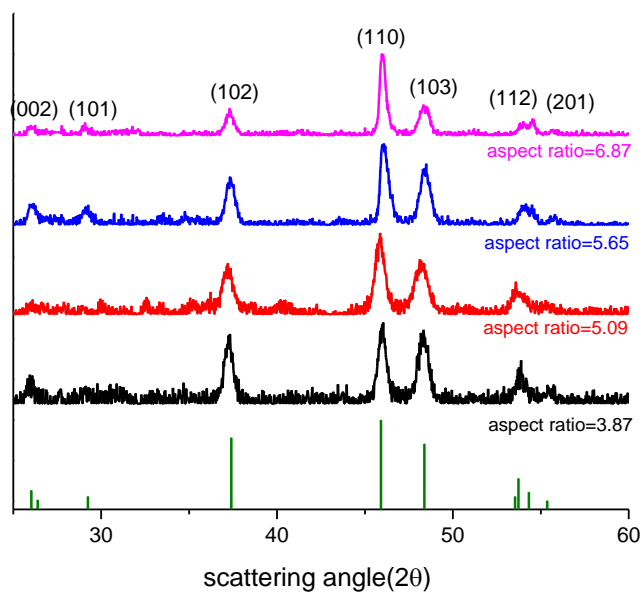

XRD spectra for powder samples of  $\text{Cu}_{2-x}\text{S}$  nanodisks that possess different aspect-ratios. As aspect ratio-increases, the relative intensity of the diffraction peak corresponding to the (110) plane increases.

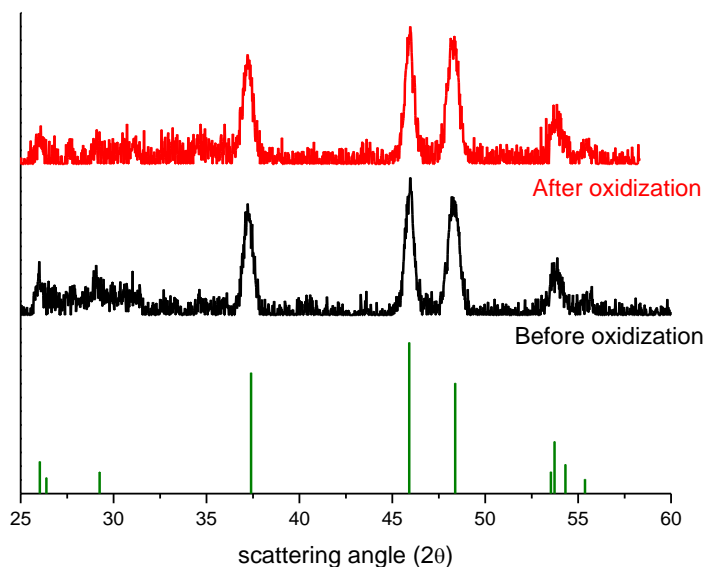

XRD spectra for powder samples of the nanodisks before and after thermal oxidation. After oxidation, a small decrease is observed in the relative intensity of the peak corresponding to the (110) crystal plane.

### Calculation of free carrier density for a nanodisk

We used the scattering theory for an oblate spheroid with semiaxes  $a < b = c$ . Polarizability can be expressed as:

$$\alpha_j = 3\varepsilon_0 V \frac{\varepsilon_j - \varepsilon_m}{3\varepsilon_m + 3L_j(\varepsilon_j - \varepsilon_m)} \quad (1)$$

Where  $j = 1, 2$  or  $3$ ,  $V$  is spheroid volume,  $\varepsilon_0$  is free space permittivity, and  $L_j$  is a shape-dependent constant which calculate by the ratio of axes of spheroid. For the disk-like spheroid with an aspect ratio (diameter –to-height) of 5,  $L_1 = 0.588$  for the electric field perpendicular to the basal plane and  $L_2 = L_3 = 0.206$  for the in-plane electric field. For the resonance, the denomination term in equation (1) must be zero:

$$3\varepsilon_m + 3L_j(\varepsilon_{r,j} - \varepsilon_m) = 0$$

$$\varepsilon_{r,j} = -\frac{(1-L_j)}{L_j} \varepsilon_m \quad (2)$$

where  $\varepsilon_{r,j}$  is real part of  $\varepsilon_j$ .  $\varepsilon_r$  can be expressed according to Drude theory

$$\varepsilon_r = 1 - \frac{\omega_p^2}{\omega^2 + \gamma^2} \quad (3)$$

where  $\omega$  is the incident radiation frequency,  $\gamma$  is the loss associated collision frequency term, and  $\omega_p$  is the bulk plasma frequency. The collision frequency  $\gamma$  can be calculated from the extinction spectrum according to:

$$\gamma = c \frac{\lambda_{1/2}}{\lambda_{max}^2} \quad (4)$$

where  $c$  is speed of light,  $\lambda_{1/2}$  is the full width wavelength at half-maximum (FWHM) of the absorption peak, and  $\lambda_{max}$  is the absorption maximum wavelength.

To calculate the free carrier density of a copper sulfide nanodisk, we used the relationship between bulk plasma frequency ( $\omega_p$ ) and carrier density ( $N_h$ ). The relationship can be expression as:

$$\omega_p = \sqrt{\frac{N_h e^2}{\varepsilon_0 m_h}} \quad (5)$$

where  $m_h$  is the hole effective mass, approximated as  $0.8m_0$  (where  $m_0$  is electron mass), and  $e$  is electron charge.

Using the information from the Fig. 1, we can calculated the free carrier density for in-plane and out-of-plane polarization:

#### **a. Out-of-plane:**

$$\lambda_{max} \approx 1800nm, \omega_{sp} = 0.69 eV, \lambda_{1/2} \approx 1100nm$$

$$\gamma = c \frac{\lambda_{1/2}}{\lambda_{max}^2} = 0.42 eV$$

Using  $L_1 = 0.588$  and equation (2):

$$\varepsilon_{r,1} = -1.57$$

Using equation (3):

$$\omega_p = \sqrt{(1 - \varepsilon_{r,1})(\omega_{sp}^2 + \gamma^2)} = 1.29 eV = 1.96 \times 10^{15} s^{-1}$$

Using equation (5):

$$N_h = \frac{\omega_p^2 \epsilon_0 m_h}{e^2} = 9.69 \times 10^{20} \text{ cm}^{-3}$$

To calculate % copper deficiency:

$$V = \pi r^2 a = 2.07 \times 10^{-18} \text{ cm}^3$$

$$\text{The number of copper atoms in the nanodisk} = N_A \times V \times \frac{\rho_{\text{Cu}_2\text{S}}}{Mw_{\text{Cu}_2\text{S}}} \times 2 = 87778$$

$$\text{The number of vacancies in the nanodisk} = V \times N_h = 2006$$

$$\% \text{ deficiencies in the nanodisk} = \frac{\text{number of deficiency in nanodisk}}{\text{number of copper in nanodisk}} \times 100\% = 2.29\%$$

**b. In-plane:**

$$\lambda_{\text{max}} \approx 3100 \text{ nm}, \omega_{\text{sp}} = 0.40 \text{ eV}, \lambda_{1/2} \approx 500 \text{ nm}$$

$$\gamma = c \frac{\lambda_{1/2}}{\lambda_{\text{max}}^2} = 1.56 \times 10^{13} \text{ s}^{-1} = 0.06 \text{ eV}$$

Using  $L_2 = 0.206$  and equation (2):

$$\epsilon_{r,2} = -8.63$$

Using equation (3):

$$\omega_p = \sqrt{(1 - \epsilon_{r,1})(\omega_{\text{sp}}^2 + \gamma^2)} = 1.26 \text{ eV} = 1.91 \times 10^{15} \text{ s}^{-1}$$

Using equation (5):

$$N_h = \frac{\omega_p^2 \epsilon_0 m_h}{e^2} = 9.20 \times 10^{20} \text{ cm}^{-3}$$

To calculate % copper deficiency:

$$V = \pi r^2 a = 2.07 \times 10^{-18} \text{ cm}^3$$

$$\text{The number of copper atoms in the nanodisk} = N_A \times V \times \frac{\rho_{\text{Cu}_2\text{S}}}{Mw_{\text{Cu}_2\text{S}}} \times 2 = 87778$$

$$\text{The number of vacancies in the nanodisk} = V \times N_h = 1904$$

$$\% \text{ deficiency in the nanodisk} = \frac{\text{number of deficiency in nanodisk}}{\text{number of copper in nanodisk}} \times 100\% = 2.17\%$$

### Change in wavelength for the out-of-plane LSPR mode

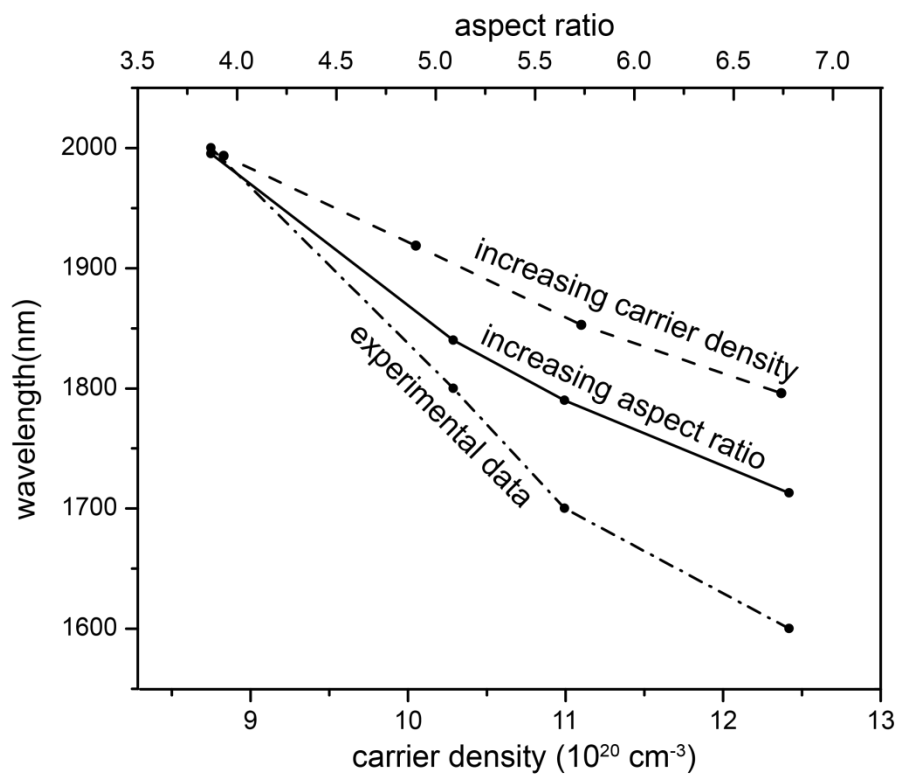

The calculated change in LSPR wavelength for the out-of-plane mode for nanodisks with independently increasing aspect ratios (solid) and carrier densities (dashed), compared to the experimental data (dot-dash) obtained from the spectra in Figure 2a.
